# Supplementary material for: The Association of Mid-Regional Pro-Adrenomedullin and Mid-Regional Pro-Atrial Natriuretic Peptide with Mortality in an Incident Dialysis Cohort
Source: PubMed Central journal article supplement (PMC3049793; doi:10.1371/journal.pone.0017803), 2011-03-07
Supplement: pone.0017803.s001.pdf [file pone.0017803.s001.pdf]

**Table S1:** The association of MR-proANP and MR-proADM as well as MR-proANP tertiles and MR-proADM tertiles and furthermore for patients with high risk (both MR-proANP and MR-proADM in the highest tertile) with different endpoints using multiple Cox-proportional hazards models.

|                                                  | All-cause mortality<br>(n events = 81) |              |         | Cardiovascular mortality*<br>(n events = 36) |              |         | Cardiovascular disease**<br>(n events = 83) |              |         | Peripheral arterial disease***<br>(n events = 53) |              |         |
|--------------------------------------------------|----------------------------------------|--------------|---------|----------------------------------------------|--------------|---------|---------------------------------------------|--------------|---------|---------------------------------------------------|--------------|---------|
|                                                  | HR                                     | 95%CI        | p-value | HR                                           | 95%CI        | p-value | HR                                          | 95%CI        | p-value | HR                                                | 95%CI        | p-value |
| <b>MR-proANP (per 1 SD increase)<sup>a</sup></b> |                                        |              |         |                                              |              |         |                                             |              |         |                                                   |              |         |
| Model 1                                          | 1.45                                   | (1.17, 1.80) | 0.001   | 1.74                                         | (1.27, 2.38) | <0.001  | 1.15                                        | (0.92, 1.45) | 0.224   | 1.30                                              | (0.98, 1.72) | 0.065   |
| Model 2                                          | 1.36                                   | (1.06, 1.73) | 0.014   | 1.72                                         | (1.22, 2.43) | 0.002   | 1.06                                        | (0.82, 1.37) | 0.641   | 1.31                                              | (0.95, 1.79) | 0.096   |
| <b>MR-proADM (per 1 SD increase)<sup>a</sup></b> |                                        |              |         |                                              |              |         |                                             |              |         |                                                   |              |         |
| Model 1                                          | 1.31                                   | (1.10, 1.57) | 0.003   | 1.41                                         | (1.10, 1.81) | 0.008   | 1.16                                        | (0.97, 1.39) | 0.095   | 1.07                                              | (0.82, 1.41) | 0.607   |
| Model 2                                          | 1.24                                   | (1.01, 1.52) | 0.039   | 1.43                                         | (1.07, 1.92) | 0.015   | 1.11                                        | (0.90, 1.36) | 0.327   | 1.08                                              | (0.80, 1.46) | 0.627   |
| <b>MR-proANP (tertiles)<sup>b</sup></b>          |                                        |              |         |                                              |              |         |                                             |              |         |                                                   |              |         |
| ≤522 pmol/L                                      | 1                                      |              |         | 1                                            |              |         | 1                                           |              |         | 1                                                 |              |         |
| 523-794 pmol/L                                   | 0.97                                   | (0.49, 1.91) | 0.926   | 1.52                                         | (0.49, 4.69) | 0.464   | 0.95                                        | (0.52, 1.76) | 0.876   | 0.87                                              | (0.39, 1.95) | 0.741   |
| ≥795 pmol/L                                      | 1.72                                   | (0.90, 3.32) | 0.103   | 2.90                                         | (0.96, 8.73) | 0.059   | 1.09                                        | (0.58, 2.04) | 0.792   | 1.02                                              | (0.46, 2.28) | 0.966   |
| <b>MR-proADM (tertiles)<sup>b</sup></b>          |                                        |              |         |                                              |              |         |                                             |              |         |                                                   |              |         |
| ≤2.40 nmol/L                                     | 1                                      |              |         | 1                                            |              |         | 1                                           |              |         | 1                                                 |              |         |
| 2.41-3.10 nmol/L                                 | 1.14                                   | (0.59, 2.19) | 0.693   | 1.06                                         | (0.39, 2.83) | 0.911   | 1.02                                        | (0.58, 1.80) | 0.932   | 1.11                                              | (0.56, 2.20) | 0.763   |
| ≥3.11 nmol/L                                     | 2.60                                   | (1.41, 4.80) | 0.002   | 3.09                                         | (1.24, 7.67) | 0.015   | 1.55                                        | (0.89, 2.72) | 0.122   | 1.35                                              | (0.66, 2.75) | 0.412   |
| <b>MR-proANP- MR-proADM- Score<sup>b</sup></b>   |                                        |              |         |                                              |              |         |                                             |              |         |                                                   |              |         |
| Low & intermediate risk                          | 1                                      |              |         | 1                                            |              |         | 1                                           |              |         | 1                                                 |              |         |
| High risk                                        | 2.95                                   | (1.80, 4.83) | <0.001  | 3.57                                         | (1.72, 7.39) | 0.001   | 1.49                                        | (0.88, 2.49) | 0.134   | 1.58                                              | (0.84, 2.95) | 0.154   |

MR-proANP, mid-regional pro-atrial natriuretic peptide; MR-proADM, mid-regional pro-adrenomedullin.

**Model 1:** adjusted for age, sex, previous CVD\*\*, diabetes mellitus, time-dependent type of renal replacement therapy.

**Model 2:** adjusted as in model 1 and additionally for albumin, CRP, smoking, native fistula, echocardiography (ejection fraction ≤60% and >60%).

<sup>a</sup> For MR-proANP and MR-proADM 1 standard deviation (SD) increment was 524 pmol/L and 1.29 nmol/L, respectively. One SD was taken as the unit of increment for each of the continuous outcome variables to ensure comparability of Hazard Ratios.

<sup>b</sup> Adjusted for age, sex, previous CVD\*\*, diabetes mellitus, time-dependent type of renal replacement therapy.

\* **CV mortality:** myocardial infarction, heart failure, sudden cardiac death, ischemic stroke, hemorrhagic stroke.

\*\* **CVD:** myocardial infarction, percutaneous transluminal coronary angioplasty, aortocoronary bypass, angiographically-proven coronary stenosis ≥50%, ischemic or hemorrhagic cerebral infarction, transient ischemic attack, carotid stenosis and carotid endarterectomy.

\*\*\* **PAD:** significant ultrasound- or angiographically-proven vascular stenosis, percutaneous transluminal angioplasty, peripheral bypass, amputation.
